1 **Title: Acoustic context modulates natural sound discrimination in auditory cortex**  
2 **through frequency specific adaptation**

3

4 *Authors:* Luciana López-Jury<sup>1\*</sup>, Francisco García-Rosales<sup>1</sup>, Eugenia González-Palomares<sup>1</sup>,  
5 Manfred Kössl<sup>1</sup>, and Julio C. Hechavarría<sup>1\*</sup>

6

7 <sup>1</sup>: Institute for Cell Biology and Neuroscience, Goethe University, 60438, Frankfurt am Main,  
8 Germany

9

10 \* Corresponding authors: Luciana Lopez Jury ([lopezjury@bio.uni-frankfurt.de](mailto:lopezjury@bio.uni-frankfurt.de)) and Julio C.  
11 ([hechavarria@bio.uni-frankfurt.de](mailto:hechavarria@bio.uni-frankfurt.de))

12

13 ORCID numbers:

14 Luciana López-Jury: 0000-0002-9384-2586

15 Francisco García-Rosales: 0000-0001-5576-2967

16 Eugenia González-Palomares: 0000-0003-3086-7601

17 Julio C. Hechavarría: 0000-0001-9277-2339

18

19 Author contributions: LLJ, JCH, FGR, and EGP designed research; LLJ performed  
20 experiments and analyzed data; LLJ wrote the original draft; JCH, FGR and EGP reviewed  
21 and edited the draft.

22

23

24

25

26

27

28

29

30

31

32

33

34

35

36 **Abstract**

37 Vocal communication is essential to coordinate social interactions in mammals and it requires  
38 a fine discrimination of communication sounds. Auditory neurons can exhibit selectivity for  
39 specific calls, but how it is affected by preceding sounds is still debated. We tackled this using  
40 ethologically relevant vocalizations in a highly vocal mammalian species: Seba's short-tailed  
41 bat. We show that cortical neurons present several degrees of selectivity for echolocation and  
42 distress calls. Embedding vocalizations within natural acoustic streams leads to stimulus-  
43 specific suppression of neuronal responses that changes sound selectivity in disparate  
44 manners: increases in neurons with poor discriminability in silence and decreases in neurons  
45 selective in silent settings. A computational model indicates that the observed effects arise  
46 from two forms of adaptation: presynaptic frequency specific adaptation acting in cortical inputs  
47 and stimulus unspecific postsynaptic adaptation. These results shed light into how acoustic  
48 context modulates natural sound discriminability in the mammalian cortex.

49

50

51

52

53

54

55

56

57

58

59

60

61

62

63

64

65

66

67

## 68 Introduction

69 Studying how vocalizations are processed in the brain of listeners is key to understand the  
70 neurobiology of acoustic communication. How neurons respond to natural sounds has been  
71 studied in many animal species from primates to bats (Newman & Wollberg, 1973; Suga *et al.*,  
72 1978; Feng *et al.*, 1990; Doupe & Konishi, 1991; Rauschecker *et al.*, 1995; Esser *et al.*, 1997).  
73 It is known that -at least some- neurons in the auditory system respond more to specific sound  
74 types. This so-called “natural sound selectivity” appears to be linked to temporal and spectral  
75 cues in the sounds perceived (Lewicki & Konishi, 1995; Wang *et al.*, 1995; Schnupp *et al.*,  
76 2006; Liu & Schreiner, 2007; Ter-Mikaelian *et al.*, 2013). Though natural sound selectivity has  
77 been studied extensively, we still debate whether and how it is affected when hearing in natural  
78 environments in which individual sounds are often preceded by other acoustic elements.

79 Sensory history refers to stimuli (auditory or from other modalities) occurring before a specific  
80 event. In the auditory modality, numerous studies have shown that leading sounds can  
81 modulate responses to upcoming ones. This modulation is present in phenomena such as  
82 forward masking (Brosch & Scheich, 2008; Scholes *et al.*, 2011), stimulus specific adaptation  
83 (Nelken & Ulanovsky, 2007; Hershenhoren *et al.*, 2014; Malmierca *et al.*, 2014) and  
84 combination sensitivity (Margoliash & Fortune, 1992; Fitzpatrick *et al.*, 1993; Esser *et al.*, 1997;  
85 Macias *et al.*, 2016), to name a few. One common issue found in the existing literature on  
86 auditory processing is that studies on neural selectivity to natural sounds often do not assess  
87 the influence of acoustic history on the selectivity observed (Klug *et al.*, 2002; Medvedev &  
88 Kanwal, 2004; Grimsley *et al.*, 2012; Mayko *et al.*, 2012). Likewise, studies on how acoustic  
89 context modulates responses to upcoming sound events are, for the most part, conducted  
90 using artificial stimuli that often do not carry any ethologically relevant information for the  
91 animals (Ulanovsky *et al.*, 2003; Scholl *et al.*, 2008; Antunes *et al.*, 2010; Phillips *et al.*, 2017).  
92 One unfortunate result of this discrepancy is that, at present, we do not know how theories  
93 formulated in experiments that used artificial sounds apply when natural vocalizations are  
94 being listened.

95 To study the latter, we conducted a series of experiments to assess natural sound processing  
96 in the auditory cortex (AC) of awake bats (*Carollia perspicillata*). Specifically, we probed  
97 cortical responses to two very distinct sound types: echolocation (used for navigation in bats)  
98 and communication (represented here by distress sounds). While listening to echolocation  
99 signals indicates the presence of a navigating conspecific, hearing a distress call indicates the  
100 presence of an individual under duress and thus a potentially harmful situation. In bats, distress  
101 sounds have strong communicative power and they trigger autonomic (Hechavarria *et al.*,  
102 2020) and hormonal responses in the listeners (Mariappan *et al.*, 2016). Navigation and  
103 distress sounds differ markedly not only in their ethological value but also in their acoustic

104 attributes, especially in their frequency composition with distress energy peaking at ~23 kHz  
105 and echolocation peaking at frequencies above 60 kHz (Hechavarria *et al.*, 2016).

106 Even though bat navigation and distress vocalizations are clearly different in their acoustics,  
107 there are neurons in the auditory system of *C. perspicillata* that can potentially respond to both  
108 signal types (Kossl *et al.*, 2014; Gonzalez-Palomares *et al.*, 2021). In other bat species, cortical  
109 neurons are known to respond to both navigation and social calls (Ohlemiller *et al.*, 1996; Esser  
110 *et al.*, 1997; Kanwal, 1999). These are neurons with ‘multi-peaked’ or broad frequency receptive  
111 fields, i.e. when tested with pure tones they respond to both low (~ 20 kHz) and high (> 60  
112 kHz) frequency tones. Studies in several animal models have shown that the peaks in  
113 ‘multi-peaked’ frequency tuning curves often correlate with the spectral components of species-  
114 specific vocalizations (Kadia & Wang, 2003; Moerel *et al.*, 2013; Kikuchi *et al.*, 2014). Although  
115 the general consensus is that ‘multi-peaked’ neurons are potentially useful for processing  
116 acoustic signals with complex spectral structures (Sutter & Schreiner, 1991), their broad tuning  
117 could make these neurons worse in discriminating between vocalization types that are  
118 potentially linked to different behaviours. To test this hypothesis, in the first part of this study  
119 we recorded activity of single AC neurons in response to natural distress and echolocation  
120 sounds. We show that -as hypothesized- the majority of multi-peaked neurons can discriminate  
121 poorly between distress and echolocation signals. However, there exist as well neurons that  
122 respond equally well to distress and navigation calls albeit having single-peaked frequency  
123 tuning curves.

124 In the second part of the study we tested how acoustic context (i.e. previous history) affects  
125 cortical responses to echolocation and distress sounds. To that end, navigation and distress  
126 sounds were presented preceded either by sequences of other navigation or distress  
127 vocalizations, resulting in stimulation conditions with expected and unexpected acoustic  
128 transitions, e.g. a distress sound following navigation calls would be “unexpected”. This  
129 experimental design aimed to mimic complex acoustic transitions that animals encounter in  
130 their natural environment. Our hypothesis was that leading acoustic context could modulate  
131 responses to upcoming sounds. We predicted responses to expected sounds to be diminished  
132 and responses to unexpected sounds to be either enhanced or less suppressed. This idea is  
133 based on the rich body-of-knowledge indicating that AC neurons are context sensitive as  
134 proven using, among others, stimulus specific adaptation ( and forward masking paradigms  
135 (Brosch & Scheich, 2008; Scholes *et al.*, 2011; Hershenhoren *et al.*, 2014; Malmierca *et al.*,  
136 2014). The results obtained confirmed our hypothesis: leading acoustic context drives  
137 stimulus-specific suppression on the cortical responses to natural sounds with the strongest  
138 suppression occurring in response to expected sounds. To our surprise, adding acoustic  
139 context before the target sounds turned poor discriminator neurons into good distress-vs.-  
140 navigation discriminators, and good discriminators into poor ones. In other words, when

141 studied in acoustically-rich and ethologically-relevant situations, natural sound discrimination  
142 at the single neuron level behaves radically different from experiments in which single sounds  
143 are used as stimuli.

144 To assess the possible origins of these results, in the third part of the study, we built a  
145 computational neuron model that was capable of replicating experimental observations. The  
146 model predicted the existence of two adaptation mechanisms: one operating at the presynaptic  
147 level that contributed to the context-specific suppression observed; and another one operating  
148 at the postsynaptic level (i.e. directly on cortical neurons) that suppressed spiking output in a  
149 context-unspecific manner. This model shares similarities with frequency-specific adaptation  
150 models used to explain stimulus-specific adaptation and the processing of speech sounds in  
151 humans (Mill *et al.*, 2011; Taaseh *et al.*, 2011; May *et al.*, 2015). The results of the present  
152 study shed light onto the neural basis of natural sound processing in the auditory cortex, and  
153 link natural sound discrimination to acoustic-context effects on sensory processing in a highly  
154 vocal mammal.

## 155 **Results**

156 We investigated how auditory cortex neurons of the bat *C. perspicillata* process two types of  
157 natural vocalizations: echolocation and communication calls. The goal was to assess how  
158 leading sequences of behaviourally relevant categories, echolocation and communication  
159 vocalizations, affect cortical responses to lagging sounds (called probes throughout the text,  
160 see Fig. 1). Probe sounds could be either *expected* (e.g. an echolocation syllable occurring  
161 after an echolocation sequence, Fig. 1c) or *unexpected* (e.g. distress syllable following an  
162 echolocation sequence). Note that this terminology refers only to neural expectations and not  
163 to a cognitive process. Probes were presented 60 ms after the context offset. In *C. perspicillata*,  
164 the main energy of echolocation and communication calls occurs at different frequencies: ~66  
165 kHz in echolocation calls (Fig. 1b, second column) and ~23 kHz in distress calls (Fig. 1b, fourth  
166 column). In addition to their frequency composition, echolocation and distress sequences differ  
167 in their temporal structure (Fig. 1b first and third columns).

### 168 *Cortical responses to echolocation and communication syllables after silence*

169 The extracellular activity of 74 units was recorded in the auditory cortex (AC) of awake bats.  
170 The neurons were classified into five groups regarding their responses to the probes presented  
171 in isolation, i.e. preceded by 3.5 s of silence (see Methods for details). The majority of units  
172 (91%, 67 out of 74) responded to both sounds (grey bars in Fig. 2a), the remaining 9% (7/74  
173 units) responded exclusively to echolocation or communication (black bars in Fig. 2a). Note  
174 that we selectively targeted high frequency regions of the auditory cortex that respond to both

175 low and high frequencies (Hagemann *et al.*, 2010; Hagemann *et al.*, 2011) and thus this result  
176 was expected.

177 In each unit, the number of spikes evoked by the two probes -that is, single echolocation and  
178 communication syllables- were statistically compared using the Cliff's delta metric. Units with  
179 *negligible* and *small* effect size ( $\text{abs}(\text{Cliff's delta}) \leq 0.3$ ) were defined as 'equally' responsive  
180 to both sounds (45/74 units). Otherwise, units with larger effect size were classified as  
181 'preference for communication (16/74 units) or 'preference for echolocation' (6/74 units) by  
182 comparing their mean spike counts (Fig. 2b). Fig. 2c shows the spike count of all units split  
183 into the three groups mentioned.

#### 184 *Linking frequency receptive fields to natural sound responsivity*

185 Next, we tested whether the units' responsiveness could be explained on the basis of overlap  
186 between the frequency spectrum of call components and their iso-level frequency tuning  
187 curves measured at 60 dB SPL. Iso-level frequency tuning curves were calculated using pure  
188 tones covering frequencies from 10 to 90 kHz (5 kHz steps) for a subset of neurons ( $n = 54$   
189 out of 74 units). Their classification according to the shape of the iso-level tuning curve is  
190 shown in Fig. 2d (see Methods for the procedure). Sixty-seven percent of the units (36/54  
191 units) presented multi-peaked frequency tuning curves (example unit in top Fig. 2e). This  
192 feature has been associated to non-tonotopically arranged areas in the AC (high-frequency  
193 fields and dorsoposterior area) in *C. perspicillata* (Hagemann *et al.*, 2010; Lopez-Jury *et al.*,  
194 2020). The remaining units studied (18/54) exhibited single-peaked tuning, associated to  
195 neurons in tonotopic areas (primary and secondary AC and anterior auditory field). From those,  
196 17 were low-frequency tuned (best frequency < 50 kHz, example unit in bottom Fig. 2e) and  
197 only one had best frequency  $\geq 50$  kHz. The iso-level tuning curves of all multi-peaked and low-  
198 frequency tuned units are shown in Supplementary Fig. 1 and the respective mean curves in  
199 Fig. 2e.

200 As expected, the majority of the neurons with multi-peaked tuning curves (67%) belonged to  
201 the group 'equally responsive' (example in Fig. 2e, top). In addition, 65% of the neurons with  
202 low-frequency iso-level tuning curve presented preferential or exclusive responses for  
203 communication sounds (example in Fig. 2e, bottom). These results indicate that, though  
204 simple, iso-level tuning curves partially predict neuronal responsiveness to natural sounds.  
205 The percentages of responsivity to natural sounds for each tuning curve group are shown in  
206 Fig. 2f.

#### 207 *Natural acoustic context suppresses cortical responses to probe sounds*

208 The effect of acoustic context -i.e. navigation or communication sound sequences preceding  
209 the presentation of probe sounds- was quantified for the 45 units that responded equally well

210 to both probes when presented after silence (Fig. 2c, left). Fig. 3a depicts the PSTHs of an  
211 example unit in response to the echolocation and communication syllables preceded either by  
212 silence (top), by a navigation context (middle) or by a communication context (bottom). In this  
213 unit, the response to both probes was reduced after context. In fact, the response to the  
214 echolocation call was completely abolished after the navigation context (Fig. 3a, middle panel  
215 left). Overall, the presence of a leading context decreased responsivity in the majority of  
216 cortical neurons regardless of the type of probe sound that followed the masking sequences  
217 (N values between 36-29 out of 45 units,  $p < 0.05$ , rank sum). Note that all black lines  
218 (significant changes) point downwards in Fig. 3b1. However, a subset of neurons did not  
219 present significant variations in the response to the probe after context ( $p > 0.05$ , rank sum),  
220 the respective spike-counts are plotted with grey lines in Fig. 3b1 (N values between 9-16).

221 Thirty-two units showed significant reduction of the response in at least three context-probe  
222 combinations and were considered as 'context-sensitive' neurons. The rest of the neurons  
223 ( $n=13$ ) were classified as context-insensitive (Fig. 3b2). In order to study if these two classes  
224 of neurons differed from each other on their intrinsic properties, we compared best frequency,  
225 spontaneous firing rate and spike waveform. Only the shape of the spikes was significantly  
226 different between the two groups (Fig. 3b3). Context-sensitive neurons showed higher values  
227 of area under the spike waveform than context-insensitive, suggesting that context-sensitive  
228 neurons could be classified as broad-spiking putative pyramidal cells and the context-  
229 insensitive neurons, as narrow-spiking putative interneurons (Tsunada *et al.*, 2012).

### 230 *Context increases cortical discrimination of natural sounds*

231 Although the example in Fig. 3a shows reduction of the probe-responses by leading context,  
232 the magnitude of the suppression was different when comparing between probes. The  
233 *expected* probes (the ones matching the leading context) in both context categories were more  
234 suppressed than the *unexpected* probes relative to the responses after silence (see context  
235 effect suppression values on top of each PSTH). The context-dependent effect illustrated in  
236 Fig. 3a was not unique to this example neuron. In fact, stronger reduction of responses to  
237 *expected* probes were common among the neurons studied (Fig. 3c), regardless of the type of  
238 context that preceded the probes ( $p = 6.4e-4$  for navigation and  $p = 1.7e-4$  for communication,  
239 signed rank). Relative to the probes preceded by silence, there was a median of 48 % of  
240 suppression for *expected* sounds versus 30 % for *unexpected* after navigation context, and  
241 37% and 28% for communication context, respectively.

242 So far, we have shown that non-selective neurons for natural sounds of different behavioural  
243 category -navigation and communication- exhibit suppression by leading acoustic context that  
244 is stimulus-specific. We reasoned that such context-specific suppression could actually render  
245 cortical neurons more "selective" to natural sounds than what one would predict by presenting

246 single sounds preceded by silence. To quantify if this was the case, we compared the Cliff's  
247 delta values (used here as a discriminability index) obtained when comparing spike counts  
248 between the isolated probes, versus the value obtained when there was leading context (Fig.  
249 3d). After both contexts, the discriminability of the probes significantly increased (values closer  
250 to -1 or 1) compared to the discriminability exhibited in silence ( $p = 4.4e-5$  after navigation and  
251  $p = 9.8e-5$  after communication, signed rank). The results showed that under navigation  
252 context, Cliff's delta values became more negative, from a median of -0.045 (in silence) to -  
253 0.38, indicative of higher number of spikes in response to communication syllable. On the other  
254 hand, the presence of communication context shifted Cliff's delta values closer to 1 (from a  
255 median of -0.045 to 0.11), which corresponds to a higher number of spikes in response to  
256 echolocation call. Similar results were obtained when the delay between probe and context  
257 was set to 416 ms (Supplementary Fig. 2a).

258 Overall, these results show that, as hypothesized, the responses to communication or  
259 echolocation syllables presented alone are more difficult to discern than when the syllables  
260 are presented after a behaviourally relevant acoustic sequence. In other words, acoustic  
261 contexts decreased the ambiguity of the response of non-selective cortical neurons by  
262 increasing the sensitivity to temporal transitions between these two sound categories.

### 263 *Effects of acoustic context on neurons with preference for communication sounds*

264 We also examined the effects of context sequences on the response of neurons classified as  
265 'preference for communication' sounds. These neurons formed the second largest neuronal  
266 group observed when presenting the sounds without context (22% of the neurons studied, Fig.  
267 2c, right). A typical example neuron that 'preferred' communication syllables can be observed  
268 in Fig. 4a (top). Note that although this neuron has a stronger response to the communication  
269 syllable, it still responded well to the echolocation call presented without any acoustic context.  
270 In this example, as in the previous neuronal group ('equally responsive' neurons, Fig. 3), the  
271 leading context suppressed the response to both probes and the suppression was stronger on  
272 *expected* sounds (second and third row in Fig. 4a). The responses to the probes after context  
273 were analysed for all the 'preference for communication' units ( $n=16$ ) and significant  
274 suppression after context was found in the majority of the neurons (Fig. 4b). Moreover,  
275 stimulus-specific suppression was found also at the population level (Supplementary Fig. 3),  
276 following the same trend exhibited by the example unit in Fig. 4, as well as in the 'equally  
277 responsive' neurons group (Fig. 3c).

278 The clearest difference between these selective neurons versus the non-selective ones  
279 occurred when the probe sounds were preceded by the communication context. To illustrate,  
280 in the example in Fig. 4a (bottom), when preceded by a communication context, the responses  
281 to communication and echolocation syllables became similar, even though they were notably

282 different when the sounds were presented without context (Fig. 4a, top). This result stems from  
283 the unbalanced suppression on probe-evoked responses (-0.46 on *expected* versus -0.33 on  
284 *unexpected*) together with the intrinsic neuronal preference for communication sounds, that  
285 brought spike outputs in response to each probe to the same level when they were presented  
286 after the communication sequence.

287 Equally strong responses to the probes after communication context was also present at the  
288 population level. To quantify the difference between probe-evoked responses, we calculated  
289 Cliff's Delta values of the spike counts in response to both probes after silence and sequences  
290 (Fig. 4c). In agreement with the example, when the context was communication, Cliff's delta  
291 values went from very negative values (preference for communication when preceded by  
292 silence) to higher values ( $p = 5.3e-4$ , signed rank), closer to zero, i.e. similar probe-evoked  
293 responses, (Fig. 4c right, see Supplementary Fig. 2b for data obtained with 416-ms delays). In  
294 addition, when the context was the navigation sequence, Cliff's Delta values became even  
295 more negative after context ( $p = 0.008$ , signed rank), indicating better discrimination and higher  
296 responsivity to *unexpected* (communication) sounds. These results indicate that good neuronal  
297 navigation- communication classifiers -according to spike counts measured with single sounds  
298 presented in silence- became in fact poor category discriminators when tested in a context of  
299 communication sounds.

300 *A computational model with frequency specific adaptation explains context dependent*  
301 *suppression observed in-vivo*

302 While single navigation and communication syllables evoked similar responses in most cortical  
303 neurons, after acoustic context, the responses shifted towards the syllable that corresponded  
304 to the *unexpected* sound. To identify which mechanisms can account for these context-  
305 dependent effects, we implemented a model of an 'equally responsive' cortical neuron based  
306 on leaky integrate-and-fire neuron models.

307 First, we modelled a single cortical neuron, set to be 'equally responsive' to both sounds  
308 categories when presented alone, and with two synaptic inputs whose firing are highly selective  
309 for either communication or echolocation signals (see diagram in Fig. 5a1). Each synapse  
310 receives spike trains whose firing rate is proportional to the degree of selectivity that each input  
311 was assumed to have for each sound category. The temporal pattern of the spike trains was  
312 assumed to follow the envelope of the respective natural sound used in each simulation. We  
313 also assumed that the degree of the input selectivity is correlated with the spectral components  
314 of the natural sounds used in our experiments. Thus, we distinguished two input classes: high-  
315 frequency tuned ( $> 45$  kHz) and low-frequency tuned ( $< 45$  kHz). The rate of the inputs in  
316 response to each syllable are shown in Fig. 5a1. Note that the firing rate of both inputs  
317 increases in response to the communication syllable, albeit to a higher degree in the low-

318 frequency tuned input. The latter is a consequence of the spectral broadness of communication  
319 calls that carry energy in both low and high frequency portions of the spectrum, as opposed to  
320 navigation signals that, in this bat species, are limited to frequencies above 50 kHz.

321 In the neuron model, each presynaptic spike induces an increment of excitatory conductance.  
322 The amplitude of this conductance change was adjusted so that the neuron responded equally  
323 to both probe sounds (echolocation and communication sounds preceded by silence), as  
324 observed in the majority of neurons measured in this study. Equivalent spiking responses to  
325 both probe sounds in one trial simulation are illustrated in Fig. 5a2. We ran 20 trial simulations  
326 per probe stimulation and the resultant PSTHs are shown in the respective insets of Fig. 5a2.

327 Simulated responses to the navigation context followed by an echolocation call and by a  
328 communication syllable are shown in Fig. 5b. The spiking of the low-frequency tuned input  
329 (red), high-frequency tuned input (blue), and that of the cortical neuron (black) are shown as  
330 raster plots in the top, middle and lower panels, respectively. Looking at the responses to the  
331 navigation context in this simulation (i.e. times before the 1.5-s mark), we observe that while  
332 the spiking of the low-frequency input (top) across 20 trials corresponds only to spontaneous  
333 activity of the input, the spiking of the high-frequency channel (middle) tightly follows the  
334 envelope of the echolocation sequence. As mentioned in the preceding text, this input  
335 selectivity was built in the model, and it is only described here to illustrate how the model works.  
336 The spiking of the cortical neuron (bottom) also exhibited a response to the navigation  
337 sequence. The latter is also expected since cortical neurons integrate both low and high  
338 frequency inputs.

339 To replicate *in-vivo* results *in-silico*, we implemented activity-dependent adaptation in the  
340 model. A likely mechanism of adaptation is synaptic depression and it has been proposed to  
341 underlie context-dependent processing (Ulanovsky *et al.*, 2004; Wehr & Zador, 2005). The  
342 temporal course of the synaptic strength associated to the spiking of the first simulation trial of  
343 each input is depicted in solid lines on top of the corresponding raster plots (Fig. 5b). The  
344 synaptic strength is proportional to the amplitude of the excitatory postsynaptic potential that  
345 each presynaptic spike produces in the cortical neuron; low values indicate less probability of  
346 spiking, high values the opposite. Because synaptic depression is activity-dependent, the  
347 synapse that receives activity from the high-frequency tuned input is more adapted (lower  
348 values of synaptic strength) than the synapse that receives only spontaneous activity from the  
349 low-frequency tuned input. The recovery time of the adaptation implemented allowed to affect  
350 output responses to forthcoming probe sounds 60 ms after the offset of the context sequence.  
351 Consequently, the spiking associated to the echolocation probe in the high-frequency tuned  
352 input (blue area in the middle-left raster plot) generated less spikes in the cortical neuron than  
353 the spiking in the low-frequency tuned input in response to the communication syllable (red

354 area in the top-right raster plot). The latter is explained by lower values of synaptic strength  
355 associated to the high-frequency tuned synapse in comparison with the low-frequency tuned  
356 synapse at the probe onset. To illustrate the difference between cortical output in response to  
357 both probes after a navigation sequence, we plotted the respective PSTHs on the right of each  
358 raster plot (Fig. 5b bottom). Note that in the absence of context, this neuron model responded  
359 equally strong to both probe sounds because both synapses are equally adapted (see Fig.  
360 5a2). A previous and constant stimulation (echolocation sequence) in the model unbalances  
361 the synaptic adaptation, prevents equal responses to communication and echolocation probes,  
362 and replicates the results obtained *in-vivo*.

363 Simulations performed with the “communication context” can be found in Supplementary Fig.  
364 4. Note that in this case, we were able to replicate *in-vivo* results only after decreasing the  
365 magnitude and the recovery time of the synaptic depression associated to the spiking of low-  
366 frequency tuned input (see Methods section and Supplementary Fig. 5 for details).

#### 367 *Requirements of the model to reproduce data*

368 Our model suggests that stimulus-specific context effect arises out of (1) segregated inputs  
369 selective for each sound category and (2) synaptic adaptation. To illustrate that these  
370 conditions are necessary to reproduce our empirical results, we ran different simulations  
371 modifying the parameters associated to these properties.

372 First, we varied the degree of input selectivity and compared the Cliff’s delta between spike  
373 counts obtained in response to navigation versus communication probes (discriminability  
374 index), as in our data analysis (Fig. 6a). The simulations showed that when the inputs have no  
375 preference for any of the signals (both inputs respond to both), the discriminability index did  
376 not change significantly after context ( $p > 0.05$ , rank sum; grey boxplots in Fig. 6a). These  
377 results proved that input selectivity was necessary to obtain stimulus-specific context effects.  
378 On the other hand, if the inputs were selective exclusively to one sound category (either  
379 navigation or communication), the discriminability index was significant and drastically different  
380 after context compared with silence ( $p < 0.001$ , rank sum; green boxplots in Fig. 6a), following  
381 the trend found empirically. However, only simulations with navigation context showed no  
382 statistical differences with our data ( $p = 0.3$  navigation;  $p = 6.0e-11$  communication, rank sum).  
383 A more biologically plausible model would assume inputs responding to the spectral features  
384 of sounds and not to sound categories: probably a middle point between no-selectivity and  
385 high selectivity. Indeed, the latter model rendered significant changes after context ( $p < 0.001$ ,  
386 rank sum; orange boxplots in Fig. 6a), but a less dramatic effect than in the previous model  
387 with high selectivity. That is, when cortical inputs showed intermediate level of selectivity,  
388 simulations with both contexts showed no differences with the empirical data ( $p = 0.1$   
389 navigation;  $p = 0.7$  communication, rank sum). Note that in this case, the input tuned to high

390 frequencies would respond at least to some extent to the high frequency components found in  
391 communication signals.

392 Secondly, we tested how different forms of adaptation influence the context-dependent  
393 modulation observed in our data. Fig. 6b shows the results of simulations using the  
394 communication sequence as leading context. As expected, a model that lacks any type of  
395 adaptation showed that the context effect on both probes was null (grey boxplots in Fig. 6b).  
396 Otherwise, a model that includes neuronal adaptation, dependent on postsynaptic spiking  
397 activity, displayed suppression of around 45% on both probes that were not significantly  
398 different from each other (green boxplots in Fig. 6b). This indicates that adaptation at the  
399 cortical neuron level allows context suppression, but not stimulus specificity. Alternatively, if  
400 the adaptation depends on presynaptic activity, the context effect becomes stimulus-specific  
401 (significant differences between the probes in blue boxplots in Fig. 6b). However, the response  
402 to the *unexpected* sound after navigation context is not suppressed ( $p > 0.05$ , one-sample rank  
403 sum, see Supplementary Fig. 6), which disagrees with our experimental data (Fig. 3c). On the  
404 other hand, a model that includes adaptation both at the level of the cortical neuron and at the  
405 presynaptic level rendered a suppressed response to *unexpected* sounds after navigation  
406 context ( $p < 0.05$ , one-sample rank sum) reproducing all the effects observed *in-vivo*. In other  
407 words, synaptic adaptation is necessary to create stimulus-specific suppression, but not  
408 enough to explain a reduction of the responses to *unexpected* sounds. We used the same  
409 models to run simulations with the echolocation sequence set as context and found similar  
410 results (see Supplementary Fig. 6).

#### 411 *Modelling responses in neurons that preferred communication sounds*

412 So far, we have shown that our computational model successfully explains the increment of  
413 neuronal discriminability after acoustic context observed in the majority of the neurons, i.e.  
414 those that were equally responsive to both echolocation and communication sounds when  
415 preceded by silence. However, a smaller set of neurons whose response to communication  
416 sounds was stronger than to echolocation, showed a decrease in the discriminability index  
417 after the communication context. To determine whether the same neuron model could explain  
418 the behaviour of this subset of neurons, we modified the maximum synaptic weight ( $w_e$ ) of both  
419 synapses in order to obtain a neuron model that possesses selectivity for communication  
420 sounds. After increasing the  $w_e$  of the low-frequency tuned synapse and decreasing the  $w_e$  of  
421 the high-frequency tuned synapse, our neuron model presented stronger responses to  
422 communication stimulation than to echolocation (see PSTHs in Fig. 6c). Without changing any  
423 other parameters in the model, we calculated the discriminability index between probes after  
424 silence and after context. The results are shown in the left boxplots in Fig. 6c. Comparable  
425 with our data (right boxplots in Fig. 6c), the neuron model increased its discriminability for the

426 probes after the navigation context (more negative Cliff's delta values in comparison with  
427 silence), but decreased the discriminability after the communication context (Cliff's delta values  
428 close to zero). To further illustrate this, we plotted the PSTHs in response to the probes across  
429 20 simulation trials obtained after each context (Supplementary Fig. 7b). The results suggest  
430 that although these two classes of neurons ('equally responsive' and 'preference for  
431 communication') possess different degrees of selectivity for single isolated natural sounds, the  
432 effects of leading context on their responses to forthcoming sounds can be explained by the  
433 same mechanisms.

## 434 **Discussion**

435 It is known that the auditory system is selective to natural and behaviourally relevant sounds.  
436 However, it is still under debate how the system detects and discriminate between specific  
437 calls among the large repertoire of animal vocalizations, especially when the calls occur within  
438 the context of other natural sounds. This study demonstrates that acoustic context affects  
439 neuronal discriminability to natural sounds in the auditory cortex of awake bats. The presence  
440 of acoustic context before the calls in question created disparate effects on neuronal sound  
441 discriminability. Context increases discriminability in units that are non-selective when tested  
442 in a silent condition (i.e. with no leading context) and has the opposite effect on units that are  
443 selective in the absence of context. An *in-silico* evaluation of our results using computational  
444 modelling predicts that two forms of adaptation, presynaptic- and postsynaptic-dependent, are  
445 necessary to reproduce the context-dependent effects *in-vivo*. Furthermore, we predict that  
446 the presynaptic activity of the context-sensitive neurons is tuned to the spectral components  
447 of the natural sounds. Our results shed light into the neuronal mechanisms of hearing in bats,  
448 but these mechanisms could be -by hypothesis- shared by other mammals.

### 449 *Cortical neurons process both echolocation and communication signals*

450 Previous studies have hypothesized that neurons in HF fields of the bat auditory cortex process  
451 both sound types: navigation signals and communication calls (Ohlemiller *et al.*, 1996; Esser  
452 *et al.*, 1997; Kanwal, 1999; Kossl *et al.*, 2014). Here, we provide strong evidence that  
453 corroborates this hypothesis. The majority of the neurons tested in this study (91%) presented  
454 responses to conspecifics' echolocation calls and to a particular type of communication call,  
455 distress calls. In a previous study, we demonstrated that neurons in the inferior colliculus of  
456 the same bat, *C. perspicillata*, process the same two types of calls (Gonzalez-Palomares *et al.*,  
457 2021). In other mammalian species, cortical neurons can respond to multiple sound  
458 categories (Newman & Wollberg, 1973; Winter & Funkenstein, 1973; Tian *et al.*, 2001;  
459 Grimsley *et al.*, 2012), although the spectral differences between the sound types are not as  
460 extreme as those observed when comparing echolocation vs. communication in bats.

461 We show that more than two-thirds of the neurons that respond to both sounds categories are  
462 unable to discriminate the calls by means of rate coding. What this result means for natural  
463 hearing is that if a bat hears an isolated echolocation or communication call (i.e. with no  
464 context) most neurons in HF fields will fire and the spike output of most individual HF neurons  
465 will not allow the bat to discriminate the heard sound. This does not mean that the bat is not  
466 able to discriminate, as discrimination could still be achieved by means of temporal codes  
467 (Wang & Kadia, 2001; Schnupp *et al.*, 2006; Liu & Schreiner, 2007; Huetz *et al.*, 2011) or  
468 based on the activity of other AC neurons with less broad frequency tuning curves, such as  
469 those found in AI, AII or AAF. In the current study, we also report a fraction of HF fields neurons  
470 that were more responsive to one particular call (either echolocation or communication). Those  
471 neurons could also play an important role in the neural categorization of single isolated natural  
472 sounds.

473 A significant proportion of the neurons exhibited ‘multi-peaked’ frequency tuning curves, which  
474 is consistent with the fact that we recorded mostly from HF fields (Hagemann *et al.*, 2010;  
475 Hagemann *et al.*, 2011). As expected, the majority of the ‘multi-peaked’ neurons were equally  
476 responsive to both natural sounds used in our study. Additionally, the majority of low-frequency  
477 tuned neurons exhibited preference for sounds with higher power at low frequencies, the  
478 communication syllables. However, we found neurons ( $n = 6$ ) that were barely responsive to  
479 pure tones at high frequencies ( $\sim 60$  kHz) and still presented responses to echolocation calls  
480 that were as strong as those obtained with communication calls. This discrepancy can be due  
481 to iso-level tuning curves not being able to predict responsivity to natural calls. Several studies  
482 have shown that the neuronal responses to complex sounds cannot be predicted based on its  
483 response profile to pure tones (Machens *et al.*, 2004; Sadagopan & Wang, 2009; Laudanski  
484 *et al.*, 2012; Feng & Wang, 2017). Bat neurons do not appear to be an exception.

#### 485 *Acoustic context modulates natural sound discrimination in auditory cortex neurons*

486 Our results provide evidence for a strong involvement of neurons in non-tonotopic areas in the  
487 processing of natural sounds (echolocation and communication) when these sounds are  
488 presented in isolation. Yet, bats are highly vocal animals and in a natural scenario, sonar and  
489 social calls from multiple conspecifics form an acoustic continuum in which sounds are often  
490 preceded by other sounds.

491 A well-established notion is that previous acoustic history (leading context) modulates neural  
492 activity in mammals (for review see Angeloni and Geffen (2018)). Generally, this is studied  
493 regarding the processing of artificial sounds, accounting for phenomena like SSA, forward  
494 masking and predictive coding (Calford & Semple, 1995; Auksztulewicz & Friston, 2016;  
495 Carbajal & Malmierca, 2018). Consistent with such studies, we observed that, overall,  
496 responses to *expected* sounds are more suppressed than responses to *unexpected* sounds.

497 This provides strong evidence indicating that the acoustic transitions between ethologically  
498 relevant sounds (communication and echolocation in bats) are represented in auditory cortex  
499 neurons in a manner similar to what has been postulated in studies that used artificial stimuli.

500 The data presented in this paper advances our thinking on how context modulates natural  
501 sound selectivity by showing that previous acoustic sequences have disparate effects on  
502 neuronal discriminability. The presence of leading context turns bad natural-sound  
503 discriminators into good ones and has the opposite effect on good discriminators. Moreover,  
504 such modulation appears to be relative to neuronal type (i.e. putative pyramidal vs. interneuron  
505 see Fig. 3b). These findings may have bearings on our interpretation on how the auditory  
506 cortex operates in natural conditions. We propose that non-selective neurons are important for  
507 coding violations to regularities in the sound stream, i.e. transitions from echolocation to  
508 communication (or vice versa). Meanwhile, neurons that appear to be selective to specific  
509 natural sound categories when there is no context would actually be worse detectors of  
510 acoustic transitions, but this population of neurons is probably key for sound discrimination in  
511 silent environments. Future studies could test whether this occurs in other mammalian species  
512 with less specialized hearing compared to bats.

### 513 *Mechanisms underlying context-specific response modulation*

514 We show that in context-sensitive neurons, the presence of a leading context always reduced  
515 responses to forthcoming sounds independently of the neuronal tuning. We propose that there  
516 is a common mechanism that underlies such context effect in cortical neurons of non-tonotopic  
517 areas. Reduction of the responsiveness after stimulation has usually been attributed to  
518 synaptic (GABAergic) inhibition as well as long-lasting mechanisms, such as synaptic  
519 depression (Wehr & Zador, 2005; Asari & Zador, 2009). Such mechanisms have been  
520 described to be activity-dependent, operating at the level of the neuron's output (Calford &  
521 Semple, 1995; Brosch & Schreiner, 1997; Wehr & Zador, 2005) or input (Ulanovsky *et al.*,  
522 2003).

523 Our model predicts that context modulation in neuronal responses to natural sounds results  
524 from two different mechanisms: adaptation dependent on the postsynaptic activity and  
525 adaptation dependent on the presynaptic activity. The model assumes that the processing of  
526 natural sounds is segregated in different frequency channels that converge into a cortical  
527 neuron that exhibits context-sensitivity. Thus, hearing the context unbalances the input-  
528 dependent adaptation and allows context-specific effects. Similar mechanisms, such as  
529 synaptic depression, have been described to explain specific suppression of repetitive artificial  
530 sounds (Chung *et al.*, 2002; Eytan *et al.*, 2003; Wehr & Zador, 2005; Rothman *et al.*, 2009).  
531 However, the suppression of *unexpected* sounds cannot be explained by frequency specific  
532 adaptation alone. We predict that postsynaptic-dependent adaptation, which attenuates every

533 input to the neurons, is needed to explain the totality of our results. Probably potassium  
534 currents are involved in this type of mechanism (Abolafia *et al.*, 2011). Previous modelling  
535 studies of ‘adaptation channels’ have explained history-dependent effects in the neuronal  
536 response to artificial sounds but using the oddball paradigm (Puccini *et al.*, 2006; Taaseh *et*  
537 *al.*, 2011; May *et al.*, 2015).

538 We should point out that in our model, the synaptic depression is assumed to occur in  
539 excitatory synapses arriving to cortical cells. However, inhibitory synapses could also  
540 reproduce our predictions. Indeed, the role of GABAergic neurotransmission has been  
541 demonstrated in similar context-dependent situations (Perez-Gonzalez *et al.*, 2012). It remains  
542 a challenge for future work to discover the biological correlate(s) of the current model  
543 synapses. Whether the synaptic depression depends on the activity of thalamic or cortical  
544 neurons remains unsolved. With our data we also cannot establish whether the effects  
545 observed originate at the cortical level, or whether are simply inherited by cortical neurons.  
546 What we do propose based on our model is that, regardless of the input origin, the selectivity  
547 to natural sounds in the presynaptic sites is tuned to the spectral components of natural  
548 sounds, more than to sound categories (response either to echolocation or communication  
549 signals). Our results showed that preference to natural sounds, but not exclusivity, is sufficient  
550 to reproduce and better fit the observed context-specific modulatory effects. The latter is in  
551 accordance with several reports in lower areas of the auditory pathway and in cortical areas,  
552 where the neurons exhibit high selectivity to natural sounds (Klug *et al.*, 2002; Mayko *et al.*,  
553 2012; Salles *et al.*, 2020).

554 In summary, our results indicate that acoustic context has strong effects on cortical neuronal  
555 discriminability of natural sounds. These effects turn neurons from non-tonotopic areas into  
556 good discriminators of natural sound transitions, and they can be explained based on multiple  
557 input channels that display adaptation and that are differentially tuned to the spectral  
558 components of natural vocalizations.

## 559 **Methods**

### 560 *Animal preparation*

561 Six bats (2 females, species *Carollia perspicillata*) were used in this study. They were taken  
562 from a breeding colony in the Institute for Cell Biology and Neuroscience at the Goethe  
563 University in Frankfurt am Main, Germany. All experiments were conducted in accordance with  
564 the Declaration of Helsinki and local regulations in the state of Hessen (Experimental permit  
565 #FU1126, Regierungspräsidium Darmstadt).

566 The bats were anesthetized with a mixture of ketamine (100 mg/ml Ketavet; Pfizer) and  
567 xylazine hydrochloride (23.32 mg/ml Rompun; Bayer). Under deep anaesthesia, the dorsal

568 surface of the skull was exposed. The underlying muscles were retracted with an incision along  
569 the midline. A custom-made metal rod was glued to the skull using dental cement to fix the  
570 head during electrophysiological recordings. After the surgery, the animals recovered for 2  
571 days before participating in the experiments.

572 On the first day of recordings, a craniotomy was performed using a scalpel blade on the left  
573 side of the cortex in the position corresponding to the auditory region. Particularly, the  
574 caudoventral region of the auditory cortex was exposed, spanning primary and secondary  
575 auditory cortices (AI and AII, respectively), the dorsoposterior field (DP) and high-frequency  
576 (HF) fields. The location of these areas was made by following patterns of blood vessels and  
577 the position of the pseudocentral sulcus (Esser & Eiermann, 1999; Hagemann *et al.*, 2010).

### 578 *Neuronal recordings*

579 In all six bats, recordings were performed over a maximum of 14 days. Experiments were  
580 conducted in awake animals. Bats were head-fixed and positioned in a custom-made holder  
581 over a warming pad whose temperature was set to 27°C. Local anaesthesia (Ropivacaine 1%,  
582 AstraZeneca GmbH) was administered topically over the skull before each session. Each  
583 recording session lasted a maximum of 4h.

584 All experiments were performed in an electrically isolated & sound-proofed chamber. For  
585 neural recordings, carbon-tip electrodes (impedance ranged from 0.4 to 1.2 M $\Omega$ ) were attached  
586 to an electrode holder connecting the electrode with a preamplifier to a DAGAN four channel  
587 amplifier (Dagan EX4-400 Quad Differential Amplifier, gain = 50, filter low cut = 0.03 Hz, high  
588 cut = 3 kHz). A/D conversion was achieved using a sound card (RME ADI-2 Pro, SR = 192  
589 kHz). Electrodes were driven into the cortex with the aid of a Piezo manipulator (PM 10/1;  
590 Science Products GmbH). Single unit auditory responses were located at depths of 308  $\pm$  79  
591  $\mu$ m, mean  $\pm$  SD, using a broadband search stimulus (downward frequency modulated  
592 communication sound of the same bat species) that triggered activity in both low and high  
593 frequency tuned neurons. A similar paradigm has been used in previous studies to locate  
594 neuronal responses (Martin *et al.*, 2017).

### 595 *Acoustic stimulation*

596 We used natural sounds to trigger neural activity during the recordings. The natural sounds  
597 were obtained from the same species in previous studies from our lab (Beetz *et al.*, 2016;  
598 Hechavarria *et al.*, 2016). Acoustic signals were generated with an RME ADI.2 Pro Sound card  
599 and amplified by a custom-made amplifier. Sounds were then produced by a calibrated  
600 speaker (NeoCD 1.0 Ribbon Tweeter; Fountek Electronics, China), which was placed 15 cm

601 in front of the bat's right ear. The speaker's calibration curve was calculated with a microphone  
602 (model 4135; Brüel & Kjaer).

603 Once an auditory neuron was located, we determined the iso-level frequency tuning of the unit,  
604 with 20-ms pure tones (0.5 ms rise/fall time) presented randomly in the range of frequencies  
605 from 10 to 90 kHz (5 kHz steps, 20 trials) at a fixed sound pressure level of 60 dB SPL. This  
606 was done only in a subset of the neurons recorded (55 out of a total of 74). Our previous  
607 studies indicate that 60 dB SPL represents a good compromise since it is strong enough to  
608 drive activity in most auditory cortex (AC) neurons and allows to differentiate between single-  
609 peaked and double-peaked tuning curves typical of the AC of this bat (Lopez-Jury *et al.*, 2020).  
610 The repetition rate for stimulus presentation was 2 Hz.

611 We studied context-dependent auditory responses using two types of acoustic contexts:  
612 sequences of echolocation calls and sequences of distress calls. We refer to these two  
613 sequences of natural vocalization as "context" because they preceded the presentation of  
614 probe sounds that were either a single echolocation or a single distress syllable. The properties  
615 of the contexts used for stimulation are depicted in Fig. 1a-b. In a nutshell, the echolocation  
616 sequence was composed of high-frequency vocalizations and their echoes (carrier frequencies  
617 > 50 kHz) repeated at intervals ~ 40 ms (Fig. 1a-b left panels). The echolocation sequence  
618 was recorded from a bat swung in a pendulum following procedures described elsewhere  
619 (Beetz *et al.*, 2016). The distress sequence, on the other hand, was composed of individual  
620 syllables with peak frequencies ~ 23 kHz (Fig. 1a-b right panels). Distress syllables occurred  
621 in groups (so-called bouts) repeated at intervals ~ 60 ms and within the bouts, syllables  
622 occurred at rates ~ 15 ms (Hechavarria *et al.*, 2016). We chose to study these two acoustic  
623 contexts because they rely on fundamentally different acoustic parameters and are linked to  
624 distinct behaviours, i.e. navigation (echolocation) and calling under duress (distress).

625 Probe sounds (sounds that followed the context) were single echolocation and distress  
626 syllables, each obtained from the respective context sequences (Fig. 1c). We tested two  
627 temporal separations (gaps) between the context offset and probe onset: 60 and 416 ms.  
628 Therefore, a total of 8 context-stimuli (2 contexts x 2 probes x 2 gaps) were randomly presented  
629 and repeated 20 times to awake bats during electrophysiological recordings: navigation  
630 context followed by navigation probe; navigation context followed by distress probe, distress  
631 context followed by navigation probe and distress context followed by distress probe. In  
632 addition, we presented each probe after 3.5 s of silence (no context).

633 *Data analysis*

634 *-Spike clustering*

635 All the recording analyses, including spike sorting, were made using custom-written Matlab  
636 scripts (R2018b; MathWorks). The raw signal was filtered between 300 Hz and 3 kHz using a  
637 bandpass Butterworth filter (3<sup>rd</sup> order). To extract spikes from the filtered signal, we detected  
638 negative peaks that were at least three standard deviations above the recording baseline;  
639 times spanning 1 ms before the peak and 2 ms after were considered as one spike. The spike  
640 waveforms were sorted using an automatic clustering algorithm, “KlustaKwik,” that uses results  
641 from PCA analyses to create spike clusters (Harris *et al.*, 2000). For each recording, we  
642 considered only the spike cluster with the highest number of spikes.

#### 643 *-Neuronal classification*

644 A total of 74 units were considered as responsive to at least one of the probe sounds tested.  
645 A unit was considered as responsive if the number of spikes fired in response to the sound in  
646 question was above the 95% confidence level calculated for spontaneous firing for the same  
647 unit (calculated along 200 ms before the start of each trial). Evoked firing had to surpass this  
648 threshold for at least 8 ms after probe onset for a unit to be considered as responsive. To test  
649 for natural sound-preferences in each unit (i.e. whether units preferred echolocation vs.  
650 distress sounds or vice versa), we used the responses to the probe sounds when they were  
651 preceded by silence (no context). The spike counts during 50 ms after each probe onset were  
652 compared using a non-parametric effect size metric: Cliff’s delta. Cliff’s delta quantifies effect  
653 size by calculating how often values in one distribution are larger than values in a second  
654 distribution. Distribution here refers to the number of spikes fired in presentations of navigation  
655 and distress probe trials. The statistic gives values from  $-1$  to  $1$ , with identical groups rendering  
656 values of zero. Following previous studies (Romano *et al.*, 2006), if the effect size between the  
657 two distributions was negligible or small ( $\text{abs}(\text{Cliff's delta}) \leq 0.3$ ), the unit was classified as  
658 ‘equally responsive’ to both probes. On the other hand, if  $\text{abs}(\text{Cliff's delta}) > 0.3$ , the unit was  
659 classified either as ‘preference to echolocation’ or ‘preference to distress’. The preference was  
660 assigned to the probe that evoked the highest number of spikes across trials. If a unit was  
661 responsive to only one of the probes, it was classified as having preference for ‘only  
662 echolocation’ or ‘only distress’. We checked the classification criterion by using non-parametric  
663 Wilcoxon rank-sum tests. Rank-sum test failed to reject the null hypothesis when comparing  
664 spike counts of the responses to both probes in all the units classified as ‘equally responsive’  
665 based on the Cliff’s delta metric. In contrast, in all sixteen units considered as ‘preference to  
666 distress’ the null hypothesis was rejected, i.e. they showed significant differences in spike  
667 counts across trials ( $p\text{-value} < 0.05$ , Wilcoxon rank-sum test).

668 The iso-level tuning curves were obtained from the average of spike counts across trials  $x_i$  in  
669 response to pure tones at  $N$  frequencies, rescaled by min-max normalization:

670 
$$x_{i,norm} = \frac{x_i - \min(x_1, \dots, x_N)}{\max(x_1, \dots, x_N) - \min(x_1, \dots, x_N)}$$

671 Units were classified as low-frequency tuned if the normalized response was higher than or  
672 equal to 0.6 at any frequency lower than 50 kHz and lower than 0.6 for all frequencies higher  
673 than or equal to 50 kHz. High-frequency tuned neurons were those in which  $x_{i,norm}$  was above  
674 0.6 for any frequency higher than or equal to 50 kHz and lower than 0.6 for all of the frequencies  
675 lower than 50 kHz. Multi-peaked neurons were those in which  $x_{i,norm}$  exceeded 0.6 in both  
676 frequency bands (< 50 kHz and >= 50 kHz). A similar classification has been used in previous  
677 studies (Lopez-Jury *et al.*, 2020).

678 *-Quantifying the effects of leading acoustic context*

679 To test for effects of leading acoustic context on probe-triggered responses, we tested (using  
680 a non-parametric Wilcoxon rank-sum test) whether the response to the probe, in terms of  
681 number of spikes across trials, occurring after the context was significantly different from the  
682 responses to the same sound presented without any context. To quantify the magnitude of the  
683 effect, we used the following equation:

684 
$$\text{context effect} = \frac{s(\text{probe}, \text{context}) - s(\text{probe}, \text{silence})}{s(\text{probe}, \text{context}) + s(\text{probe}, \text{silence})}$$

685 where  $s(\text{probe}, \text{context})$  corresponds to the number of spikes during 50 ms from the onset of  
686 the corresponding probe following the corresponding context and  $s(\text{probe}, \text{silence})$ , following  
687 silence. Effects of the same context on different probe-triggered responses were statistically  
688 compared per unit using paired statistics (Wilcoxon signed rank test). In addition, we compared  
689 the calculated effect size (Cliff's delta test) between probes after silence with the same  
690 measurement after context, using also paired statistics (Wilcoxon signed rank test). According  
691 to our convention, negative Cliff's delta values indicate higher responses to the distress probe  
692 than to the echolocation probe. Positive Cliff's delta values indicate the opposite. For space  
693 reasons, the results presented in this paper focus only to data obtained using a temporal gap  
694 of 60 ms between context offset and probe onset. Data obtained with 416-ms gaps rendered  
695 similar results (Supplementary Fig. 2).

696 *Modelling possible synaptic origins of contextual neural response modulation*

697 We modelled a broadly-tuned cortical neuron that reproduces the behaviour of 'equally'  
698 responsive neurons observed in our experiments, using an integrate-and-fire neuron model.  
699 Our model (described in detail below) receives input from two narrow frequency channels and  
700 includes synaptic adaptation (i.e. activity-dependent depression) in the cortical input synapses.

701 Frequency specific adaptation in multiple synaptic channels has been proposed to mediate  
702 stimulus-specific adaptation in auditory cortex, including during speech processing (Taaseh *et*  
703 *al.*, 2011; May & Tiitinen, 2013). All simulations were performed using the Python package  
704 Brian 2 version 2.3 (Stimberg *et al.*, 2019).

705 In the model proposed, the neuron's membrane potential ( $V_m$ ) evolves according to the  
706 following differential equation:

$$707 \quad \frac{dV_m}{dt} = \frac{g_L(E_L - V_m) + g_e(E_e - V_m)}{C_m} + \sigma\sqrt{2/\tau_\sigma} x_i$$

708 where  $g_L$  is the leak conductance,  $E_L$  is the resting potential,  $C_m$  is the membrane capacitance,  
709  $E_e$  is the excitatory reversal potential and  $g_e$  is the synaptic conductance. The second term of  
710 the equation corresponds to stochastic current added to the neuron model.  $x_i$  is a Gaussian  
711 random variable specified by an Ornstein-Uhlenbeck process, with variance  $\sigma$  and correlation  
712 time  $\tau_\sigma$ .

713 The neuron fires when  $V_m$  reaches the membrane potential threshold  $\omega_{th}$  and the variable  $V_m$   
714 is reset to the fixed value  $V_r$ . To implement a reduction of the firing in response to constant  
715 stimulation, we added an adaptive threshold to the model that decreases the probability of  
716 firing with postsynaptic activity. The firing threshold  $\omega_{th}$  starts at  $V_{th}$  and after the occurrence  
717 of a spike, it is increased by the amount  $\Delta_{th}$  and it returns back to  $V_{th}$  with a time constant  $\tau_{th}$ ,  
718 that is,

$$719 \quad \frac{d\omega_{th}}{dt} = \frac{(V_{th} - \omega_{th})}{\tau_{th}}$$

720 The model includes conductance-based excitatory synapses, every synapse creates a  
721 fluctuation of conductance  $g_e$  that change in time with time constant  $\tau_e$ , as follow,

$$722 \quad \frac{dg_e}{dt} = -\frac{g_e}{\tau_e}$$

723 When an action potential arrives at a synapse, the excitatory conductance  $g_e$  increases in the  
724 postsynaptic neuron, according to

$$725 \quad g_e \leftarrow g_e + w_e X_s(t)$$

726 where  $w_e$  is the maximum synaptic weight and is modulated by a time-dependent adaptation  
727 term  $X_s(t)$ . The effective synaptic weight between the inputs and the cortical neuron was the  
728 product  $w_e X_s(t)$  and depended on the presynaptic activity. The model assumes that  $X_s$  starts  
729 at one and a presynaptic spike arrival at synapse induces a decrement of  $X_s$  value by the  
730 amount  $\Delta_s$ , which recovers in time by:

731 
$$\frac{dX_s}{dt} = \Omega_s(1 - X_s)$$

732 The neuron model has two excitatory synapses that receive inputs, which differ by their  
733 preference for natural sounds stimulation. The input of the synapse  $j$  corresponds to a spike  
734 train that follows an inhomogeneous Poisson process with rate  $\lambda_j$  :

735 
$$\lambda_j(t) = s_{sound}(t) (k_{j,sound} v) + v_{spont}$$

736 where  $s_{sound}(t)$  corresponds to the envelope in time of the respective natural sound,  $k_{j,sound}$   
737 is proportional to the response of input  $j$  to the respective sound,  $v$  is the average firing rate of  
738 the inputs and  $v_{spont}$  is the spontaneous firing rate of the inputs.

### 739 *Model parameters and data fitting*

740 All the parameters used in the model are indicated in Table 1. The parameters associated to  
741 intrinsic properties of the neuron model were set to qualitatively mimic the extracellular activity  
742 of cortical neurons. The parameters that determine the dynamic of the adaptive threshold ( $\Delta_{th}$   
743 and  $\tau_{th}$ ) were set to produce a reduction of 40-50% in the response to the probes after any  
744 context, as observed empirically.

745 In our model the reversal potential  $E_e$  of excitatory synapses was set to a standard value used  
746 for modelling AMPA synapses (Clopath *et al.*, 2010). The time constant  $\tau_e$  was adjusted to  
747 obtain spiking responses to the probes qualitatively similar in duration with the observed  
748 experimental data.

749 The maximum synaptic weight  $w_e$  of each synapse was set in order to fit experimental data.  
750 We ran 81 simulations systematically changing the maximum synaptic weight of each synapse  
751 independently from 1 to 9 nS, in steps of 1 nS. For each simulation we compared statistically  
752 (using Wilcoxon rank-sum test) 50 neuron models with the 45 units classified as 'equally'  
753 responsive, regarding Cliff's delta values between probe-responses (Supplementary Fig. 8a1).  
754 In addition, the chosen parameters were constraint to fit approximately the number of spikes  
755 evoked by each probe observed empirically (Supplementary Fig. 8a2).

756 We assumed that the spiking of the inputs was tuned to the spectral content of natural sounds:  
757 high-frequency tuned ( $\geq 45$  kHz) and low-frequency tuned ( $< 45$  kHz). Considering the spectral  
758 distribution of the vocalizations used as context (Fig. 1b), high-frequency tuned input was set  
759 to be responsive to biosonar signals as well as to distress syllables, and low-frequency tuned  
760 input to only distress. The input selectivity to natural sounds is given by the parameter  $k_{j,sound}$ .  
761 We tested several ratios of selectivity to distress syllables between the inputs  
762 ( $k_{low,distress}/k_{high,distress}$ ), ranging from equally responsive to low-frequency input exclusively  
763 responsive. The ratios were tested for several synaptic decrement values (Supplementary Fig.

764 8b) since the behaviour of the model is highly dependent on this parameter. Ratios close to 1  
765 were unable to reproduce our data after context, especially after the communication sequence.  
766 We chose a ratio of 0.7/0.1 because it is similar to the proportion of low frequencies  
767 components relative to high frequencies in distress calls. The average rate of the inputs was  
768 calibrated to generate spike trains with one or two spikes during the probe stimulation (~1.5  
769 ms of duration).

770 Our model includes short-term synaptic adaptation (i.e. activity-dependent depression) that  
771 depends essentially on two parameters: the synaptic decrement  $\Delta_s$  and the adaptation  
772 recovery rate  $\Omega_s$ . The interplay between these two parameters was systematically tested by  
773 changing them on each synapse. Results in terms of Cliff's delta values obtained between the  
774 two probes are shown in Supplementary Fig. 5a-b. The chosen values do not show significant  
775 differences with experimental data after both contexts. To check whether the chosen  
776 parameters fit the data independently of the synaptic weight of the synapses, we ran several  
777 simulations changing the maximum synaptic weight of each synapse. No matter which value  
778 was tested, the discriminability index was always lower after navigation context and higher  
779 after communication context in comparison with the values obtained after silence  
780 (Supplementary Fig. 5c).

781 Finally, we modified our model in order to reproduce experimental data obtained in units  
782 classified as 'preference to distress'. We ran several simulations changing the maximum  
783 synaptic weight  $w_e$  of each synapse (Supplementary Fig. 7a). A higher synaptic weight in the  
784 low-frequency synapse and lower weight in the high-frequency synapse turned our neuron  
785 model into a 'preference to distress' unit. Without changing any other parameter, we observed  
786 that the model reproduces the behaviour of these neurons after context (Supplementary Fig.  
787 7b).

788

## 789 References

790 Abolafia, J.M., Vergara, R., Arnold, M.M., Reig, R. & Sanchez-Vives, M.V. (2011) Cortical auditory  
791 adaptation in the awake rat and the role of potassium currents. *Cereb Cortex*, **21**, 977-990.

792

793 Angeloni, C. & Geffen, M.N. (2018) Contextual modulation of sound processing in the auditory  
794 cortex. *Curr Opin Neurobiol*, **49**, 8-15.

795

796 Antunes, F.M., Nelken, I., Covey, E. & Malmierca, M.S. (2010) Stimulus-specific adaptation in the  
797 auditory thalamus of the anesthetized rat. *PLoS One*, **5**, e14071.

798

799 Asari, H. & Zador, A.M. (2009) Long-lasting context dependence constrains neural encoding models in  
800 rodent auditory cortex. *J Neurophysiol*, **102**, 2638-2656.

- 801  
802 Aukstulewicz, R. & Friston, K. (2016) Repetition suppression and its contextual determinants in  
803 predictive coding. *Cortex*, **80**, 125-140.
- 804  
805 Beetz, M.J., Hechavarría, J.C. & Kossel, M. (2016) Cortical neurons of bats respond best to echoes from  
806 nearest targets when listening to natural biosonar multi-echo streams. *Sci Rep*, **6**, 35991.
- 807  
808 Brosch, M. & Scheich, H. (2008) Tone-sequence analysis in the auditory cortex of awake macaque  
809 monkeys. *Exp Brain Res*, **184**, 349-361.
- 810  
811 Brosch, M. & Schreiner, C.E. (1997) Time course of forward masking tuning curves in cat primary  
812 auditory cortex. *J Neurophysiol*, **77**, 923-943.
- 813  
814 Calford, M.B. & Semple, M.N. (1995) Monaural inhibition in cat auditory cortex. *J Neurophysiol*, **73**,  
815 1876-1891.
- 816  
817 Carbajal, G.V. & Malmierca, M.S. (2018) The Neuronal Basis of Predictive Coding Along the Auditory  
818 Pathway: From the Subcortical Roots to Cortical Deviance Detection. *Trends Hear*, **22**,  
819 2331216518784822.
- 820  
821 Chung, S., Li, X. & Nelson, S.B. (2002) Short-term depression at thalamocortical synapses contributes  
822 to rapid adaptation of cortical sensory responses in vivo. *Neuron*, **34**, 437-446.
- 823  
824 Clopath, C., Busing, L., Vasilaki, E. & Gerstner, W. (2010) Connectivity reflects coding: a model of  
825 voltage-based STDP with homeostasis. *Nat Neurosci*, **13**, 344-352.
- 826  
827 Doupe, A.J. & Konishi, M. (1991) Song-selective auditory circuits in the vocal control system of the  
828 zebra finch. *Proc Natl Acad Sci U S A*, **88**, 11339-11343.
- 829  
830 Esser, K.H., Condon, C.J., Suga, N. & Kanwal, J.S. (1997) Syntax processing by auditory cortical  
831 neurons in the FM-FM area of the mustached bat *Pteronotus parnellii*. *Proc Natl Acad Sci U S*  
832 *A*, **94**, 14019-14024.
- 833  
834 Esser, K.H. & Eiermann, A. (1999) Tonotopic organization and parcellation of auditory cortex in the  
835 FM-bat *Carollia perspicillata*. *Eur J Neurosci*, **11**, 3669-3682.
- 836  
837 Eytan, D., Brenner, N. & Marom, S. (2003) Selective adaptation in networks of cortical neurons. *J*  
838 *Neurosci*, **23**, 9349-9356.
- 839  
840 Feng, A.S., Hall, J.C. & Gooler, D.M. (1990) Neural basis of sound pattern recognition in anurans. *Prog*  
841 *Neurobiol*, **34**, 313-329.
- 842  
843 Feng, L. & Wang, X. (2017) Harmonic template neurons in primate auditory cortex underlying  
844 complex sound processing. *Proc Natl Acad Sci U S A*, **114**, E840-E848.

- 845  
846 Fitzpatrick, D.C., Kanwal, J.S., Butman, J.A. & Suga, N. (1993) Combination-sensitive neurons in the  
847 primary auditory cortex of the mustached bat. *J Neurosci*, **13**, 931-940.
- 848  
849 Gonzalez-Palomares, E., Lopez-Jury, L., Garcia-Rosales, F. & Hechavarria, J.C. (2021) Enhanced  
850 representation of natural sound sequences in the ventral auditory midbrain. *Brain Struct*  
851 *Funct*, **226**, 207-223.
- 852  
853 Grimsley, J.M., Shanbhag, S.J., Palmer, A.R. & Wallace, M.N. (2012) Processing of communication  
854 calls in Guinea pig auditory cortex. *PLoS One*, **7**, e51646.
- 855  
856 Hagemann, C., Esser, K.H. & Kossl, M. (2010) Chronotopically organized target-distance map in the  
857 auditory cortex of the short-tailed fruit bat. *J Neurophysiol*, **103**, 322-333.
- 858  
859 Hagemann, C., Vater, M. & Kossl, M. (2011) Comparison of properties of cortical echo delay-tuning in  
860 the short-tailed fruit bat and the mustached bat. *J Comp Physiol A Neuroethol Sens Neural*  
861 *Behav Physiol*, **197**, 605-613.
- 862  
863 Harris, K.D., Henze, D.A., Csicsvari, J., Hirase, H. & Buzsaki, G. (2000) Accuracy of tetrode spike  
864 separation as determined by simultaneous intracellular and extracellular measurements. *J*  
865 *Neurophysiol*, **84**, 401-414.
- 866  
867 Hechavarria, J.C., Beetz, M.J., Macias, S. & Kossl, M. (2016) Distress vocalization sequences  
868 broadcasted by bats carry redundant information. *J Comp Physiol A Neuroethol Sens Neural*  
869 *Behav Physiol*, **202**, 503-515.
- 870  
871 Hechavarria, J.C., Jerome Beetz, M., Garcia-Rosales, F. & Kossl, M. (2020) Bats distress vocalizations  
872 carry fast amplitude modulations that could represent an acoustic correlate of roughness. *Sci*  
873 *Rep*, **10**, 7332.
- 874  
875 Hershenhoren, I., Taaseh, N., Antunes, F.M. & Nelken, I. (2014) Intracellular correlates of stimulus-  
876 specific adaptation. *J Neurosci*, **34**, 3303-3319.
- 877  
878 Huetz, C., Gourevitch, B. & Edeline, J.M. (2011) Neural codes in the thalamocortical auditory system:  
879 from artificial stimuli to communication sounds. *Hear Res*, **271**, 147-158.
- 880  
881 Kadia, S.C. & Wang, X. (2003) Spectral integration in A1 of awake primates: neurons with single- and  
882 multi-peaked tuning characteristics. *J Neurophysiol*, **89**, 1603-1622.
- 883  
884 Kanwal, J.S. (1999) Processing species-specific calls by combination-sensitive neurons in an  
885 echolocating bat. *The design of animal communication*, 135-157.
- 886  
887 Kikuchi, Y., Horwitz, B., Mishkin, M. & Rauschecker, J.P. (2014) Processing of harmonics in the lateral  
888 belt of macaque auditory cortex. *Front Neurosci*, **8**, 204.
- 889

- 890 Klug, A., Bauer, E.E., Hanson, J.T., Hurley, L., Meitzen, J. & Pollak, G.D. (2002) Response selectivity for  
891 species-specific calls in the inferior colliculus of Mexican free-tailed bats is generated by  
892 inhibition. *J Neurophysiol*, **88**, 1941-1954.
- 893
- 894 Kossel, M., Hechavarria, J.C., Voss, C., Macias, S., Mora, E.C. & Vater, M. (2014) Neural maps for target  
895 range in the auditory cortex of echolocating bats. *Curr Opin Neurobiol*, **24**, 68-75.
- 896
- 897 Laudanski, J., Edeline, J.M. & Huetz, C. (2012) Differences between spectro-temporal receptive fields  
898 derived from artificial and natural stimuli in the auditory cortex. *PLoS One*, **7**, e50539.
- 899
- 900 Lewicki, M.S. & Konishi, M. (1995) Mechanisms underlying the sensitivity of songbird forebrain  
901 neurons to temporal order. *Proc Natl Acad Sci U S A*, **92**, 5582-5586.
- 902
- 903 Liu, R.C. & Schreiner, C.E. (2007) Auditory cortical detection and discrimination correlates with  
904 communicative significance. *PLoS Biol*, **5**, e173.
- 905
- 906 Lopez-Jury, L., Mannel, A., Garcia-Rosales, F. & Hechavarria, J.C. (2020) Modified synaptic dynamics  
907 predict neural activity patterns in an auditory field within the frontal cortex. *Eur J Neurosci*,  
908 **51**, 1011-1025.
- 909
- 910 Machens, C.K., Wehr, M.S. & Zador, A.M. (2004) Linearity of cortical receptive fields measured with  
911 natural sounds. *J Neurosci*, **24**, 1089-1100.
- 912
- 913 Macias, S., Mora, E.C., Hechavarria, J.C. & Kossel, M. (2016) Echo-level compensation and delay tuning  
914 in the auditory cortex of the mustached bat. *Eur J Neurosci*, **43**, 1647-1660.
- 915
- 916 Malmierca, M.S., Sanchez-Vives, M.V., Escera, C. & Bendixen, A. (2014) Neuronal adaptation, novelty  
917 detection and regularity encoding in audition. *Front Syst Neurosci*, **8**, 111.
- 918
- 919 Margoliash, D. & Fortune, E.S. (1992) Temporal and harmonic combination-sensitive neurons in the  
920 zebra finch's HVc. *J Neurosci*, **12**, 4309-4326.
- 921
- 922 Mariappan, S., Bogdanowicz, W., Raghuram, H., Marimuthu, G. & Rajan, K.E. (2016) Structure of  
923 distress call: implication for specificity and activation of dopaminergic system. *J Comp Physiol*  
924 *A Neuroethol Sens Neural Behav Physiol*, **202**, 55-65.
- 925
- 926 Martin, L.M., Garcia-Rosales, F., Beetz, M.J. & Hechavarria, J.C. (2017) Processing of temporally  
927 patterned sounds in the auditory cortex of Seba's short-tailed bat, *Carollia perspicillata*. *Eur J*  
928 *Neurosci*, **46**, 2365-2379.
- 929
- 930 May, P.J. & Tiitinen, H. (2013) Temporal binding of sound emerges out of anatomical structure and  
931 synaptic dynamics of auditory cortex. *Front Comput Neurosci*, **7**, 152.
- 932
- 933 May, P.J., Westo, J. & Tiitinen, H. (2015) Computational modelling suggests that temporal integration  
934 results from synaptic adaptation in auditory cortex. *Eur J Neurosci*, **41**, 615-630.

- 935  
936 Mayko, Z.M., Roberts, P.D. & Portfors, C.V. (2012) Inhibition shapes selectivity to vocalizations in the  
937 inferior colliculus of awake mice. *Front Neural Circuits*, **6**, 73.
- 938  
939 Medvedev, A.V. & Kanwal, J.S. (2004) Local field potentials and spiking activity in the primary  
940 auditory cortex in response to social calls. *J Neurophysiol*, **92**, 52-65.
- 941  
942 Mill, R., Coath, M., Wennekers, T. & Denham, S.L. (2011) A neurocomputational model of stimulus-  
943 specific adaptation to oddball and Markov sequences. *PLoS Comput Biol*, **7**, e1002117.
- 944  
945 Moerel, M., De Martino, F., Santoro, R., Ugurbil, K., Goebel, R., Yacoub, E. & Formisano, E. (2013)  
946 Processing of natural sounds: characterization of multipeak spectral tuning in human  
947 auditory cortex. *J Neurosci*, **33**, 11888-11898.
- 948  
949 Nelken, I. & Ulanovsky, N. (2007) Mismatch negativity and stimulus-specific adaptation in animal  
950 models. *Journal of Psychophysiology*, **21**, 214-223.
- 951  
952 Newman, J.D. & Wollberg, Z. (1973) Multiple coding of species-specific vocalizations in the auditory  
953 cortex of squirrel monkeys. *Brain Res*, **54**, 287-304.
- 954  
955 Ohlemiller, K.K., Kanwal, J.S. & Suga, N. (1996) Facilitative responses to species-specific calls in  
956 cortical FM-FM neurons of the mustached bat. *Neuroreport*, **7**, 1749-1755.
- 957  
958 Perez-Gonzalez, D., Hernandez, O., Covey, E. & Malmierca, M.S. (2012) GABA(A)-mediated inhibition  
959 modulates stimulus-specific adaptation in the inferior colliculus. *PLoS One*, **7**, e34297.
- 960  
961 Phillips, E.A.K., Schreiner, C.E. & Hasenstaub, A.R. (2017) Diverse effects of stimulus history in waking  
962 mouse auditory cortex. *J Neurophysiol*, **118**, 1376-1393.
- 963  
964 Puccini, G.D., Sanchez-Vives, M.V. & Compte, A. (2006) Selective detection of abrupt input changes  
965 by integration of spike-frequency adaptation and synaptic depression in a computational  
966 network model. *J Physiol Paris*, **100**, 1-15.
- 967  
968 Rauschecker, J.P., Tian, B. & Hauser, M. (1995) Processing of complex sounds in the macaque  
969 nonprimary auditory cortex. *Science*, **268**, 111-114.
- 970  
971 Romano, J., Kromrey, J.D., Coraggio, J. & Skowronek, J. (Year) Appropriate statistics for ordinal level  
972 data: Should we really be using t-test and Cohen'sd for evaluating group differences on the  
973 NSSE and other surveys. Vol. 177, annual meeting of the Florida Association of Institutional  
974 Research. City.
- 975  
976 Rothman, J.S., Cathala, L., Steuber, V. & Silver, R.A. (2009) Synaptic depression enables neuronal gain  
977 control. *Nature*, **457**, 1015-1018.
- 978

- 979 Sadagopan, S. & Wang, X. (2009) Nonlinear spectrotemporal interactions underlying selectivity for  
980 complex sounds in auditory cortex. *J Neurosci*, **29**, 11192-11202.
- 981
- 982 Salles, A., Park, S., Sundar, H., Macias, S., Elhilali, M. & Moss, C.F. (2020) Neural Response Selectivity  
983 to Natural Sounds in the Bat Midbrain. *Neuroscience*, **434**, 200-211.
- 984
- 985 Schnupp, J.W., Hall, T.M., Kokelaar, R.F. & Ahmed, B. (2006) Plasticity of temporal pattern codes for  
986 vocalization stimuli in primary auditory cortex. *J Neurosci*, **26**, 4785-4795.
- 987
- 988 Scholes, C., Palmer, A.R. & Sumner, C.J. (2011) Forward suppression in the auditory cortex is  
989 frequency-specific. *Eur J Neurosci*, **33**, 1240-1251.
- 990
- 991 Scholl, B., Gao, X. & Wehr, M. (2008) Level dependence of contextual modulation in auditory cortex. *J*  
992 *Neurophysiol*, **99**, 1616-1627.
- 993
- 994 Stimberg, M., Brette, R. & Goodman, D.F. (2019) Brian 2, an intuitive and efficient neural simulator.  
995 *Elife*, **8**.
- 996
- 997 Suga, N., O'Neill, W.E. & Manabe, T. (1978) Cortical neurons sensitive to combinations of  
998 information-bearing elements of biosonar signals in the mustache bat. *Science*, **200**, 778-781.
- 999
- 1000 Sutter, M.L. & Schreiner, C.E. (1991) Physiology and topography of neurons with multi-peaked tuning  
1001 curves in cat primary auditory cortex. *J Neurophysiol*, **65**, 1207-1226.
- 1002
- 1003 Taaseh, N., Yaron, A. & Nelken, I. (2011) Stimulus-specific adaptation and deviance detection in the  
1004 rat auditory cortex. *PLoS One*, **6**, e23369.
- 1005
- 1006 Ter-Mikaelian, M., Semple, M.N. & Sanes, D.H. (2013) Effects of spectral and temporal disruption on  
1007 cortical encoding of gerbil vocalizations. *J Neurophysiol*, **110**, 1190-1204.
- 1008
- 1009 Tian, B., Reser, D., Durham, A., Kustov, A. & Rauschecker, J.P. (2001) Functional specialization in  
1010 rhesus monkey auditory cortex. *Science*, **292**, 290-293.
- 1011
- 1012 Tsunada, J., Lee, J.H. & Cohen, Y.E. (2012) Differential representation of auditory categories between  
1013 cell classes in primate auditory cortex. *J Physiol*, **590**, 3129-3139.
- 1014
- 1015 Ulanovsky, N., Las, L., Farkas, D. & Nelken, I. (2004) Multiple time scales of adaptation in auditory  
1016 cortex neurons. *J Neurosci*, **24**, 10440-10453.
- 1017
- 1018 Ulanovsky, N., Las, L. & Nelken, I. (2003) Processing of low-probability sounds by cortical neurons.  
1019 *Nat Neurosci*, **6**, 391-398.
- 1020
- 1021 Wang, X. & Kadia, S.C. (2001) Differential representation of species-specific primate vocalizations in  
1022 the auditory cortices of marmoset and cat. *J Neurophysiol*, **86**, 2616-2620.

1023  
1024  
1025  
1026  
  
1027  
1028  
1029  
  
1030  
1031  
1032  
1033  
  
1034  
1035  
1036  
1037  
1038  
1039  
1040  
1041  
1042  
1043  
1044  
1045  
1046  
1047  
1048  
1049  
1050  
1051  
1052  
1053  
1054  
1055  
1056  
1057  
1058

Wang, X., Merzenich, M.M., Beitel, R. & Schreiner, C.E. (1995) Representation of a species-specific vocalization in the primary auditory cortex of the common marmoset: temporal and spectral characteristics. *J Neurophysiol*, **74**, 2685-2706.

Wehr, M. & Zador, A.M. (2005) Synaptic mechanisms of forward suppression in rat auditory cortex. *Neuron*, **47**, 437-445.

Winter, P. & Funkenstein, H.H. (1973) The effect of species-specific vocalization on the discharge of auditory cortical cells in the awake squirrel monkey. (*Saimiri sciureus*). *Exp Brain Res*, **18**, 489-504.



1059

1060 **Figure 1. The stimulation paradigm.**

1061 **a** Oscillogram and spectrogram of natural calls of *C. perspicillata* associated with navigation  
 1062 and communication behaviours: a sequence of echolocation calls (left) and a distress call  
 1063 (right). **b** Distribution of inter-sound intervals and frequencies of the sequences above. Arrows  
 1064 indicate independent components within the sequences. The vertical red lines in temporal  
 1065 distributions indicate the temporal gap between the end of the natural sequence and the onset  
 1066 of the probe in our stimulation paradigm ( $\tau_{\text{gap}} = 60$  ms). In spectral distributions, red lines  
 1067 indicate the peak of the distribution ( $f_{\text{nav}} = 66$  kHz and  $f_{\text{com}} = 23$  kHz). **c** Oscillograms of the  
 1068 stimulation protocol. Natural sequences preceding a short probe (highlighted by a diamond).  
 1069 Below, spectrograms of the last 150 ms of stimulus (dashed rectangle) point out the last  
 1070 element of each sequence and the subsequent probe. Time between the offset of the  
 1071 sequence and the onset of the probe is indicated as  $\tau_{\text{gap}}$  in white and the frequency at peak  
 1072 energy of the probes is indicated by dashed arrows.

1073

1074

1075

1076

1077

1078



1079

1080 **Figure 2. Neuronal classification of the responses to natural sounds without acoustic**  
 1081 **context.**

1082 **a** Number of units classified according to their responses to a single echolocation call and a  
 1083 distress syllable. Categories were defined considering the number of spikes evoked during 50  
 1084 ms from the sound onset ('equally':  $\text{abs}(\text{Cliff's delta}) \leq 0.3$ ; 'pref.':  $\text{abs}(\text{Cliff's delta}) > 0.3$ ). Grey  
 1085 bars correspond to units responsive to both sounds. Black bars, to units that are only  
 1086 responsive to one sound. **b** Cliff's delta calculated for neuronal classification for units  
 1087 responsive to both sounds. Size effect interpretation are indicated by shade areas. **c** Average  
 1088 number of spikes across trials in response to both probes per classification. Grey lines indicate  
 1089 non significant differences between spike counts ( $p\text{-value} > 0.05$ , Wilcoxon rank sum test).  
 1090 Red and black lines correspond to units that showed significant differences ( $p\text{-value} < 0.05$ ,  
 1091 Wilcoxon rank sum test). Error bars correspond to standard errors across trials. **d** Number of  
 1092 units according to their iso-level frequency tuning shape. Low- and high-tuned correspond to  
 1093 one-peak tuning curves, peaking at  $< 50$  kHz and  $> 50$  kHz, respectively. **e** Two examples of  
 1094 units classified as 'multi-peaked' (black top) and low-frequency tuned (black bottom). The red  
 1095 iso-level tuning curves indicate the average across units and the shade area, the standard  
 1096 error. At the right, the corresponding peri-stimulus time histogram (PSTH) in response to each  
 1097 probe. **f**, Percentage of units classified by their response to natural sounds per iso-level tuning  
 1098 curve shape.

1099

1100

1101

1102

1103

1104



1105

1106 **Figure 3. Stimulus-specific suppression on neuronal responses by leading acoustic**  
 1107 **context.**

1108 **a** Responses to echolocation call and distress syllable of a unit classified as 'equally  
 1109 responsive', after 3.5 s of silence (top), after a sequence of echolocation (middle) and after a  
 1110 sequence of distress (bottom). **b1** Average number of spikes across trials in response to a  
 1111 probe after silence (*no context*) and after context (*expected* or *unexpected*). *Expected* in a  
 1112 navigation context corresponds to the response to an echolocation call and *unexpected* to a  
 1113 distress syllable; and vice-versa in the communication context. Black lines correspond to  
 1114 significant decrement ( $p$ -value<0.05, Wilcoxon signed rank test) and grey, non-significant.  
 1115 Error bar corresponds to standard error across trials. **b2** Number of units that presented  
 1116 significant suppression in 0 to 4 context-probe combinations. **b3** Spike waveforms (average  
 1117 per isolated single unit) of context-insensitive neurons (green) and context-sensitive neurons  
 1118 (orange). At the bottom, the distributions of the corresponding areas under the waveform. **c**  
 1119 Context effect quantification of 'equally responsive' units for *expected* and *unexpected* probes.  
 1120 Lines join values from the same neuron. Grey lines correspond to units with a higher  
 1121 suppression on *expected* sounds. Otherwise, the lines are pink. **d** Cliff's delta of 'equally  
 1122 responsive' units comparing echolocation and distress responses after silence and after  
 1123 acoustic context. Significance level is indicated above the plots c-d;  $p$ -values were obtained  
 1124 using the paired test Wilcoxon signed rank.



1125

1126 **Figure 4. Context modulation in selective neurons decreased neuronal discriminability.**

1127 **a** Responses to echolocation call and distress syllable of a unit classified as ‘preference for  
 1128 distress’, after 3.5 s of silence (top), after a sequence of echolocation (middle) and after a  
 1129 sequence of distress (bottom). **b** Average number of spikes across trials in response to a  
 1130 probe after silence (*no context*) and after context (*expected* or *unexpected*). Black lines  
 1131 correspond to significant decrement ( $p$ -value<0.05, Wilcoxon rank sum test) and grey, non-  
 1132 significant. Error bar corresponds to standard error. **c** Cliff’s delta of ‘preference for distress’  
 1133 units comparing responses to echolocation and distress syllables after silence and after  
 1134 acoustic context (Wilcoxon signed rank test).

1135

1136

1137

1138

1139

1140

1141

1142

1143

1144

1145

1146

1147

1148



1149

1150 **Figure 5. Computational modelling of stimulus-specific suppression by leading**  
 1151 **context on cortical neurons.**

1152 **a1** Diagram of the components of the model. Red and blue arrows correspond to the inputs of  
 1153 the neuron model. The rate (in kHz) of the spiking of each input in response to echolocation  
 1154 call and distress syllable. **a2** Membrane potential of the neuron model in response to both  
 1155 probes. Insets show simulated PSTH across 20 trials for the corresponding sounds. **b** Example  
 1156 of 20 simulations of neuronal responses to a navigation sequence followed by an echolocation  
 1157 call (left) and by a distress syllable (right). Raster plots indicate the spiking of the inputs (top  
 1158 and middle) and of the cortical neuron model (bottom). On top of the rasters, the time evolution  
 1159 of the synaptic strength associated to the spiking of the first trial of each input. The insets show  
 1160 the PSTH obtained from the neuron model during 25 ms after the onset of the probe for each  
 1161 stimulation. The parameters used in the model are indicated in Table 1.

1162

1163

1164



1165

1166 **Figure 6. Requirements of the model to reproduce empirical results.**

1167 **a** Discriminability index after silence, after the echolocation sequence (nav) and after distress  
 1168 (com) using models with different degrees of selectivity in the inputs. ‘No-selectivity’: model in  
 1169 which inputs were not selective for any type of signals, navigation or communication, although  
 1170 responded to both of them. ‘High’: inputs exhibited exclusive selectivity for one signal. ‘Low’:  
 1171 input selectivity correlates with the spectral components of the natural sounds. Right boxplots  
 1172 show the discriminability index obtained from our empirical data. **b** Communication context  
 1173 effect calculated for *expected* and *unexpected* probes using models with different forms of  
 1174 adaptation. ‘No adapt’: model without any type of adaptation. ‘Post’: model with neuronal  
 1175 adaptation. ‘Pre’: model with synaptic adaptation. ‘Both’: model with neuronal and synaptic  
 1176 adaptation. Right boxplots show the respective context effect obtained from experimental data.  
 1177 **c** Simulated PSTHs in response to both probes and discriminability index obtained from a  
 1178 model in which the synaptic weights were unbalance (as illustrated in the diagram). The neuron  
 1179 model assumes ‘low’ and ‘both’ conditions. In all the comparisons, the significance level is  
 1180 indicated above; *p*-values were obtained using non-paired Wilcoxon rank sum test for the  
 1181 simulations, and the paired Wilcoxon signed rank for the real data. The parameters used on  
 1182 each model are indicated in Table 2.

|      | Parameters                                          | Values   |
|------|-----------------------------------------------------|----------|
| 1183 |                                                     |          |
| 1184 | <i>Neuron model</i>                                 |          |
|      | $C_m$ , membrane capacitance                        | 100 pF   |
| 1185 | $E_L$ , leak reversal potential                     | -55 mV   |
|      | $g_L$ , leak conductance                            | 5 nS     |
| 1186 | $V_{th}$ , firing threshold potential               | -50 mV   |
|      | $V_r$ , reset potential                             | -55 mV   |
| 1187 | $\sigma$ , sigma noise                              | 2 mV     |
|      | $\tau_\sigma$ , time constant noise                 | 10 ms    |
| 1188 | <i>Neuronal adaptation</i>                          |          |
|      | $\Delta_{th}$ , adaptive threshold increment        | 0.005 mV |
| 1189 | $\tau_{th}$ , adaptive threshold time constant      | 5 s      |
|      | <i>Excitatory synapses</i>                          |          |
| 1190 | $E_e$ , excitatory reversal potential               | 0 mV     |
|      | $\tau_e$ , excitatory time constant                 | 10 ms    |
|      | $w_e$ , synaptic weight                             | 6 nS     |
| 1191 | <i>Input</i>                                        |          |
|      | $v$ , average input rate                            | 2 / ms   |
| 1192 | $v_{spont}$ , spontaneous input rate                | 1 / s    |
|      | $k_{i,com}$ , response input $i$ to communication   | 0.7      |
| 1193 | $k_{j,com}$ , response input $j$ to communication   | 0.1      |
|      | $k_{i,nav}$ , response input $i$ to navigation      | 0        |
| 1194 | $k_{j,nav}$ , response input $j$ to navigation      | 1.5      |
|      | <i>Synaptic adaptation</i>                          |          |
| 1195 | $\Omega_{i,s}$ , adaptation recovery rate input $i$ | 1.9 / s  |
|      | $\Omega_{j,s}$ , adaptation recovery rate input $j$ | 1.4 / s  |
| 1196 | $\Delta_{i,s}$ , synaptic decrement input $i$       | 0.0125   |
|      | $\Delta_{j,s}$ , synaptic decrement input $j$       | 0.025    |

1197 **Table 1. Parameters used in the neuron model.**

1198

1199

1200

1201

1202

1203

1204

1205

1206

1207

1208

1209

1210

1211

1212

1213

|      |                                                   |          |
|------|---------------------------------------------------|----------|
| 1214 | <b>Models varying degree of input selectivity</b> |          |
| 1215 | <i>No</i>                                         |          |
| 1216 | $k_{i,com}$ , response input $i$ to communication | 0.4      |
| 1217 | $k_{j,com}$ , response input $j$ to communication | 0.4      |
| 1218 | $k_{i,nav}$ , response input $i$ to navigation    | 0.8      |
| 1219 | $k_{j,nav}$ , response input $j$ to navigation    | 0.8      |
| 1220 | <i>High</i>                                       |          |
| 1221 | $k_{i,com}$ , response input $i$ to communication | 0.8      |
| 1222 | $k_{j,com}$ , response input $j$ to communication | 0        |
| 1223 | $k_{i,nav}$ , response input $i$ to navigation    | 0        |
| 1224 | $k_{j,nav}$ , response input $j$ to navigation    | 1.5      |
| 1225 | <i>Low</i>                                        |          |
| 1226 | $k_{i,com}$ , response input $i$ to communication | 0.7      |
| 1227 | $k_{j,com}$ , response input $j$ to communication | 0.1      |
| 1228 | $k_{i,nav}$ , response input $i$ to navigation    | 0        |
| 1229 | $k_{j,nav}$ , response input $j$ to navigation    | 1.5      |
| 1230 | <b>Models varying adaptation</b>                  |          |
| 1231 | <i>None</i>                                       |          |
| 1232 | $\Delta_{th}$ , adaptive threshold increment      | 0 mV     |
| 1233 | $\Delta_{i,s}$ , synaptic decrement input $i$     | 0.0      |
| 1234 | $\Delta_{j,s}$ , synaptic decrement input $j$     | 0.0      |
| 1235 | <i>Post</i>                                       |          |
| 1236 | $\Delta_{th}$ , adaptive threshold increment      | 0.005 mV |
| 1237 | $\Delta_{i,s}$ , synaptic decrement input $i$     | 0.0      |
| 1238 | $\Delta_{j,s}$ , synaptic decrement input $j$     | 0.0      |
| 1239 | <i>Pre</i>                                        |          |
| 1240 | $\Delta_{th}$ , adaptive threshold increment      | 0 mV     |
| 1241 | $\Delta_{i,s}$ , synaptic decrement input $i$     | 0.0125   |
| 1242 | $\Delta_{j,s}$ , synaptic decrement input $j$     | 0.025    |
| 1243 | <i>Both</i>                                       |          |
| 1244 | $\Delta_{th}$ , adaptive threshold increment      | 0.005 mV |
| 1245 | $\Delta_{i,s}$ , synaptic decrement input $i$     | 0.0125   |
| 1246 | $\Delta_{j,s}$ , synaptic decrement input $j$     | 0.025    |

**Table 2. Parameters that were modified from the fitted neuron model.**
